# Supplementary material
Source: PubMed Central journal article supplement (PMC4350766)
Supplement: NIHMS574007-supplement-1.pdf [file NIHMS574007-supplement-1.pdf]

## SUPPLEMENTARY INFORMATION

Supplementary Table 1. Lifespan and lifetime egg production of mated female Canton-S flies on 0.1X or 1.0X diets containing 0, 1, 10, or 100 mM Met.

| Fig. | GB | Sex | Diets |        | Lifespan |                   |             | Reproduction |                             |               |
|------|----|-----|-------|--------|----------|-------------------|-------------|--------------|-----------------------------|---------------|
|      |    |     | AA    | Met    | n        | Mean $\pm$ s.e.m. | % increase* | n            | Egg production $\pm$ s.d.** | % increase*** |
| 1    | S  | F   | 0.1X  | 0 mM   | 146      | 51.10 $\pm$ 0.73  | -32.85      | 40           | 14.62 $\pm$ 4.62            | -67.55        |
|      | S  | F   |       | 1 mM   | 144      | 76.10 $\pm$ 1.02  | Control     | 40           | 45.04 $\pm$ 3.85            | Control       |
|      | S  | F   |       | 10 mM  | 150      | 69.30 $\pm$ 1.32  | -8.94       | 40           | 35.96 $\pm$ 2.22            | -20.17        |
|      | S  | F   | 1.0X  | 0 mM   | 191      | 41.31 $\pm$ 0.77  | -19.69      | 40           | 49.54 $\pm$ 4.90            | -73.04        |
|      | S  | F   |       | 1.5 mM | 205      | 52.33 $\pm$ 1.10  | 1.74        | 40           | 84.71 $\pm$ 9.11            | -53.90        |
|      | S  | F   |       | 10 mM  | 205      | 51.44 $\pm$ 1.14  | Control     | 40           | 183.77 $\pm$ 9.63           | Control       |
|      | S  | F   |       | 100 mM | 205      | 40.30 $\pm$ 1.17  | -21.65      | 40           | 137.82 $\pm$ 20.10          | -25.00        |

GB: Genetic Background, S: Canton-S, F: Female, AA: Amino acids

\*: % increase of mean lifespan over flies on the control diets (1 mM Met-0.1X and 10 mM Met-1.0X)

\*\*: Average of lifetime egg production counted on for 24 hours every three day from 4 independent experiments

\*\*\*: % increase of egg production over flies on the control diets (1 mM Met-0.1X and 10 mM Met-1.0X)

Supplementary Table 2. Test of homogeneity of survivorship and lifetime egg production shown in Supplementary Table 1.

| Fig. | GB | Sex | AA   | Diets for comparison |        | Lifespan |              | Reproduction             |
|------|----|-----|------|----------------------|--------|----------|--------------|--------------------------|
|      |    |     |      | Met                  |        | Log-Rank |              | Student's <i>t</i> -test |
|      |    |     |      |                      |        | $\chi^2$ | $p > \chi^2$ |                          |
| 1    | S  | F   | 0.1X | 1 mM                 | 0 mM   | 253.5835 | <.0001       | p<.01                    |
|      | S  | F   |      | 1 mM                 | 10 mM  | 9.103    | 0.0026       | p=0.048                  |
|      | S  | F   | 1X   | 10 mM                | 1.5 mM | 0.0016   | 0.9678       | p<.01                    |
|      | S  | F   |      | 10 mM                | 100 mM | 36.3905  | <.0001       | p=0.039                  |
|      | S  | F   |      | 1.5 mM               | 0 mM   | 106.701  | <.0001       | p<.01                    |

Supplementary Table 3. Lifespan and test of homogeneity of survivorship.

| Fig. | GB | Sex     | Diets |                  | Lifespan |                   | Log-Rank    |          |                 |
|------|----|---------|-------|------------------|----------|-------------------|-------------|----------|-----------------|
|      |    |         | AA    | Met              | n        | Mean $\pm$ s.e.m. | % increase* | $\chi^2$ | $\rho > \chi^2$ |
| 2&3  | S  | F       | 0.1X  | 0.15 mM          | 195      | 47.49 $\pm$ 0.81  | -0.29       | 3.4203   | 0.0644          |
|      | S  | F       |       | 1 mM             | 196      | 47.63 $\pm$ 0.60  |             | Control  |                 |
|      | S  | F       |       | 10 mM            | 184      | 42.64 $\pm$ 0.69  | -10.48      | 37.468   | <.0001          |
|      | S  | M       |       | 0.15 mM          | 191      | 45.31 $\pm$ 0.69  | 7.93        | 12.1657  | 0.0005          |
|      | S  | M       |       | 1 mM             | 187      | 41.98 $\pm$ 0.67  |             | Control  |                 |
|      | S  | M       |       | 10 mM            | 196      | 43.73 $\pm$ 0.65  | 4.17        | 2.3669   | 0.1239          |
|      | R  | F       |       | 0.15 mM          | 203      | 37.92 $\pm$ 0.57  | -13.64      | 62.7935  | <.0001          |
|      | R  | F       |       | 1 mM             | 203      | 43.91 $\pm$ 0.57  |             | Control  |                 |
|      | R  | F       |       | 10 mM            | 201      | 39.09 $\pm$ 0.51  | -10.98      | 43.5385  | <.0001          |
|      | R  | M       |       | 0.15 mM          | 202      | 35.03 $\pm$ 0.55  | -9.48       | 20.3038  | <.0001          |
|      | R  | M       |       | 1 mM             | 198      | 38.70 $\pm$ 0.50  |             | Control  |                 |
|      | R  | M       |       | 10 mM            | 206      | 38.23 $\pm$ 0.46  | -1.21       | 0.3137   | 0.5754          |
|      | W  | F       |       | 0.15 mM          | 91       | 53.08 $\pm$ 0.89  | -7.75       | 10.7038  | 0.0011          |
|      | W  | F       |       | 1 mM             | 94       | 57.54 $\pm$ 0.85  |             | Control  |                 |
|      | W  | F       |       | 10 mM            | 81       | 43.96 $\pm$ 1.21  | -23.6       | 43.3324  | <.0001          |
| W    | M  | 0.15 mM | 99    | 57.55 $\pm$ 0.75 | -2.74    | 7.7404            | 0.0054      |          |                 |
| W    | M  | 1 mM    | 94    | 59.17 $\pm$ 0.97 |          | Control           |             |          |                 |
| W    | M  | 10 mM   | 85    | 57.64 $\pm$ 1.20 | -2.59    | 0.0301            | 0.8623      |          |                 |

GB: Genetic Background, S: Canton-S, R: Oregon-R, W: *w<sup>1118</sup>*, F: Female, M: Male, AA: Amino acids

\*: % increase of mean lifespan over flies on the control diets (1 mM Met)

Supplementary Table 4. Lifespan and lifetime egg production of mated female Canton-S flies on 0.1X, 0.4X, or 1.0X diets containing 0, 0.15, or 1 mM Met.

| Fig. | GB | Sex | Diets |         | Lifespan |                   |             | Reproduction |                             |               |
|------|----|-----|-------|---------|----------|-------------------|-------------|--------------|-----------------------------|---------------|
|      |    |     | AA    | Met     | n        | Mean $\pm$ s.e.m. | % increase* | n            | Egg production $\pm$ s.d.** | % increase*** |
| 4    | S  | F   |       | 0 mM    | 147      | 49.69 $\pm$ 0.66  | -34.95      | 40           | 45.66 $\pm$ 4.93            | -14.09        |
|      | S  | F   | 0.4X  | 0.15 mM | 123      | 76.39 $\pm$ 1.44  | Control     | 40           | 53.15 $\pm$ 5.92            | Control       |
|      | S  | F   |       | 1 mM    | 150      | 66.82 $\pm$ 0.96  | -12.53      | 40           | 108.32 $\pm$ 10.38          | 103.80        |
|      | S  | F   |       | 0 mM    | 151      | 47.40 $\pm$ 0.52  | -21.39      | 40           | 44.54 $\pm$ 4.63            | -20.02        |
|      | S  | F   | 0.7X  | 0.15 mM | 150      | 60.30 $\pm$ 1.11  | Control     | 40           | 55.69 $\pm$ 2.84            | Control       |
|      | S  | F   |       | 1 mM    | 150      | 60.42 $\pm$ 1.05  | 0.20        | 40           | 131.13 $\pm$ 18.65          | 135.45        |
|      | S  | F   |       | 0 mM    | 134      | 40.70 $\pm$ 0.63  | -12.57      | 40           | 49.54 $\pm$ 5.99            | -21.61        |
|      | S  | F   | 1.0X  | 0.15 mM | 143      | 46.55 $\pm$ 1.06  | Control     | 40           | 63.20 $\pm$ 3.06            | Control       |
|      | S  | F   |       | 1 mM    | 144      | 55.60 $\pm$ 1.27  | 19.44       | 40           | 148.76 $\pm$ 12.53          | 135.38        |

GB: Genetic Background, S: Canton-S, F: Female, AA: Amino acids

\*: % increase of mean lifespan over flies on the control diets (0.15 mM Met in each amino acid diet)

\*\* : Average of lifetime egg production counted on for 24 hours every three day from 4 independent experiments

\*\*\*: % increase of egg production over flies on the control diets (0.15 mM Met in each amino acid diet)

Supplementary Table 5. Test of homogeneity of survivorship and lifetime egg production shown in Supplementary Table 4.

| Fig. | GB | Sex | AA   | Diets for comparison |      | Lifespan |              | Reproduction             |
|------|----|-----|------|----------------------|------|----------|--------------|--------------------------|
|      |    |     |      | Met                  |      | Log-Rank |              | Student's <i>t</i> -test |
|      |    |     |      |                      |      | $\chi^2$ | $p > \chi^2$ |                          |
| 4    | S  | F   | 0.4X | 0.15 mM              | 0 mM | 195.4226 | <.0001       | p=0.308                  |
|      | S  | F   |      | 0.15 mM              | 1 mM | 53.1079  | <.0001       | p<.01                    |
|      | S  | F   | 0.7X | 0.15 mM              | 0 mM | 115.4874 | <.0001       | p=0.03                   |
|      | S  | F   |      | 0.15 mM              | 1 mM | 0.0004   | 0.9842       | p=0.02                   |
|      | S  | F   | 1.0X | 0.15 mM              | 0 mM | 33.3613  | <.0001       | p=0.01                   |
|      | S  | F   |      | 0.15 mM              | 1 mM | 31.7566  | <.0001       | p<.01                    |

GB: Genetic Background, S: Canton-S, F: Female, AA: Amino acids

Supplementary Table 6. Test of homogeneity of survivorship and lifetime egg production shown in Supplementary Table 4.

| Fig. | GB | Sex | Met     | Diets for comparison |      | % increase* | Lifespan |              | Reproduction             |
|------|----|-----|---------|----------------------|------|-------------|----------|--------------|--------------------------|
|      |    |     |         | AA                   |      |             | Log-Rank |              | Student's <i>t</i> -test |
|      |    |     |         |                      |      |             | $\chi^2$ | $p > \chi^2$ |                          |
| 4    | S  | F   | 0 mM    | 0.4X                 | 1.0X | -22.09      | 88.3917  | <.0001       | p=0.828                  |
|      | S  | F   | 0.15 mM | 0.4X                 | 1.0X | -64.10      | 183.4938 | <.0001       | p=0.185                  |
|      | S  | F   | 1 mM    | 0.4X                 | 1.0X | -20.17      | 26.3467  | <.0001       | p=0.09                   |

GB: Genetic Background, S: Canton-S, F: Female, AA: Amino acids

\*: % increase of mean lifespan over flies on the 0.4X diets (0.4X Vs 1.0X)

Supplementary Table 7. Correlation between mean lifespan and lifetime egg production shown in Supplementary Table 4.

| Changes in Met                            | AA   | Correlation between mean lifespan and lifetime egg production* |                 |
|-------------------------------------------|------|----------------------------------------------------------------|-----------------|
|                                           |      | Pearson Coefficient                                            | p-value         |
| Decrease from 1.0 mM Met<br>to 0.15mM Met | 0.4X | -0.963 ~ -0.864                                                | 0.0021 ~ 0.0265 |
|                                           | 0.7X | -0.184 ~ 0.278                                                 | 0.5941 ~ 0.9923 |
|                                           | 1.0X | 0.662 ~ 0.963                                                  | 0.0020 ~ 0.1522 |

\* Three independent measurements of mean lifespan and three independent measurements of lifetime egg production were taken at each diet. Pearson correlation coefficients and p-values were computed for all potential combinations of the measurements, and the ranges were indicated above. Under methionine restriction, there was a strong negative correlation between mean lifespan and lifetime egg production on the low amino acid status, but no correlation or weak correlation on the high amino acid status.

Supplementary Table 8. Lifespan of virgin female Canton-S flies on 0.1X, 0.4X, or 1.0X diets containing 0, 0.15, or 1 mM Met.

| Fig. | GB | Sex  | Diets |         | Lifespan |                   |             |
|------|----|------|-------|---------|----------|-------------------|-------------|
|      |    |      | AA    | Met     | n        | Mean $\pm$ s.e.m. | % increase* |
| 7    | S  | F(V) |       | 0 mM    | 103      | 46.37 $\pm$ 0.82  | -33.79      |
|      | S  | F(V) | 0.4X  | 0.15 mM | 92       | 70.04 $\pm$ 2.18  | Control     |
|      | S  | F(V) |       | 1 mM    | 93       | 57.06 $\pm$ 1.40  | -18.53      |
|      | S  | F(V) |       | 0 mM    | 111      | 43.00 $\pm$ 0.59  | -31.98      |
|      | S  | F(V) | 0.7X  | 0.15 mM | 97       | 63.22 $\pm$ 1.47  | Control     |
|      | S  | F(V) |       | 1 mM    | 93       | 56.74 $\pm$ 1.24  | -10.25      |
|      | S  | F(V) |       | 0 mM    | 100      | 39.63 $\pm$ 0.67  | -20.60      |
|      | S  | F(V) | 1.0X  | 0.15 mM | 105      | 49.91 $\pm$ 1.30  | Control     |
|      | S  | F(V) |       | 1 mM    | 101      | 54.06 $\pm$ 1.44  | 8.31        |

GB: Genetic Background, S: Canton-S, F(V): Virgin female, AA: Amino acids

\*: % increase of mean lifespan over flies on the control diets (0.15 mM Met in each amino acid diet)



Supplementary Table 9. Test of homogeneity of survivorship shown in Supplementary Table 8.

| Fig. | GB | Sex  | AA   | Diets for comparison |      | Lifespan |              |
|------|----|------|------|----------------------|------|----------|--------------|
|      |    |      |      | Met                  |      | Log-Rank |              |
|      |    |      |      |                      |      | $\chi^2$ | $p > \chi^2$ |
| 7    | S  | F(V) | 0.4X | 0.15 mM              | 0 mM | 112.9819 | <.0001       |
|      | S  | F(V) |      | 0.15 mM              | 1 mM | 35.7991  | <.0001       |
|      | S  | F(V) | 0.7X | 0.15 mM              | 0 mM | 138.8413 | <.0001       |
|      | S  | F(V) |      | 0.15 mM              | 1 mM | 14.632   | 0.0001       |
|      | S  | F(V) | 1.0X | 0.15 mM              | 0 mM | 70.4184  | <.0001       |
|      | S  | F(V) |      | 0.15 mM              | 1 mM | 6.9342   | 0.0085       |

GB: Genetic Background, S: Canton-S, F(V): Virgin female, AA: Amino acids

Supplementary Table 10. Yeast replicative lifespan on various Met diets.

| Fig. | GB    | Diets |             | n  | Mean lifespan (Replication times) |
|------|-------|-------|-------------|----|-----------------------------------|
|      |       | AA    | Met (mg/ml) |    |                                   |
| 7    | Yeast | 1.0X  | 1           | 30 | 16.30                             |
|      |       |       | 0.5         | 30 | 18.50                             |
|      |       |       | 0.1         | 30 | 17.63                             |
|      |       |       | 0.05        | 30 | 22.03**                           |
|      |       |       | 0.005       | 30 | 23.40**                           |

GB: Genetic Background, AA: Amino acids

\*Rank sum test was performed on all tested samples and \*\* means  $p < .05$  when compared with yeast lifespan on 1, 0.5, and 0.1 mg/ml Met diets

Supplementary Table 11. Yeast replicative lifespan on various Met and amino acids diets.

| Fig. | GB    | Diets |             | n  | Mean lifespan<br>(Replication times) | % increase | Rank sum |
|------|-------|-------|-------------|----|--------------------------------------|------------|----------|
|      |       | AA    | Met (mg/ml) |    |                                      |            |          |
| 7    | Yeast | 1.0X  | 0.5         | 30 | 16.27                                | Control    | p<.05    |
|      |       |       | 0.05        | 30 | 19.73                                | 21.31      |          |
|      |       | 0.2X  | 0.5         | 30 | 14.97                                | Control    | p<.0001  |
|      |       |       | 0.05        | 30 | 21.03                                | 40.53      |          |

GB: Genetic Background, AA: Amino acids

\*: % increase of mean lifespan over yeast on control diets (0.5 mg/ml Met in each amino acid diet)

Supplementary Table 12. Lifespan and test of homogeneity of survivorship of mated female flies on 0.4X or 1.0X diets containing 0.2 or 1 mM Met.

| Fig. | GB                       | Sex | Diets for comparison |        |     | Lifespan          |             | Log-Rank |                 |
|------|--------------------------|-----|----------------------|--------|-----|-------------------|-------------|----------|-----------------|
|      |                          |     | AA                   | Met    | n   | Mean $\pm$ s.e.m. | % increase* | $\chi^2$ | $\rho > \chi^2$ |
| 8    | <i>Da-GAL4&gt;dInRDN</i> | F   | 1.0X                 | 0.2 mM | 104 | 48.87 $\pm$ 1.00  | -16.55      | 41.00    | <.0001          |
|      | <i>Da-GAL4&gt;dInRDN</i> | F   |                      | 1 mM   | 106 | 58.56 $\pm$ 1.29  | Control     |          |                 |
|      | <i>Da-GAL4&gt;dInRDN</i> | F   | 0.4X                 | 0.2 mM | 106 | 64.50 $\pm$ 0.93  | -2.88       | 2.70     | 0.10            |
|      | <i>Da-GAL4&gt;dInRDN</i> | F   |                      | 1 mM   | 103 | 66.41 $\pm$ 1.03  | Control     |          |                 |
|      | <i>+&gt;dInRDN</i>       | F   | 1.0X                 | 0.2 mM | 94  | 52.69 $\pm$ 0.90  | -12.82      | 30.01    | <.0001          |
|      | <i>+&gt;dInRDN</i>       | F   |                      | 1 mM   | 81  | 60.44 $\pm$ 1.16  | Control     |          |                 |
|      | <i>+&gt;dInRDN</i>       | F   | 0.4X                 | 0.2 mM | 101 | 66.83 $\pm$ 1.01  | 15.86       | 31.22    | <.0001          |
|      | <i>+&gt;dInRDN</i>       | F   |                      | 1 mM   | 88  | 57.68 $\pm$ 1.22  | Control     |          |                 |
|      | <i>Da-GAL4&gt;dTSC2</i>  | F   | 1.0X                 | 0.2 mM | 149 | 49.77 $\pm$ 0.87  | -18.44      | 59.56    | <.0001          |
|      | <i>Da-GAL4&gt;dTSC2</i>  | F   |                      | 1 mM   | 147 | 61.02 $\pm$ 1.20  | Control     |          |                 |
|      | <i>Da-GAL4&gt;dTSC2</i>  | F   | 0.4X                 | 0.2 mM | 142 | 66.44 $\pm$ 0.68  | -21.88      | 239.31   | <.0001          |
|      | <i>Da-GAL4&gt;dTSC2</i>  | F   |                      | 1 mM   | 152 | 85.05 $\pm$ 0.72  | Control     |          |                 |
|      | <i>+&gt;dTSC2</i>        | F   | 1.0X                 | 0.2 mM | 106 | 53.89 $\pm$ 0.93  | -17.85      | 54.65    | <.0001          |
|      | <i>+&gt;dTSC2</i>        | F   |                      | 1 mM   | 104 | 65.60 $\pm$ 1.21  | Control     |          |                 |
|      | <i>+&gt;dTSC2</i>        | F   | 0.4X                 | 0.2 mM | 111 | 74.57 $\pm$ 1.17  | 4.03        | 6.21     | 0.01            |
|      | <i>+&gt;dTSC2</i>        | F   |                      | 1 mM   | 111 | 71.68 $\pm$ 1.07  | Control     |          |                 |

GB: Genetic Background, F: Female, AA: Amino acids, +: *w<sup>1118</sup>*

\*: % increase of mean lifespan over flies on the control diets (1 mM Met in each amino acid diet)

Supplementary Table 13. Lifespan and test of homogeneity of survivorship of mated female flies on 0.4X or 1.0X diets containing 0.2 or 1 mM Met.

| Fig. | GB                       | Sex | Diets |        | Lifespan |                   |            | Log-Rank |                 |
|------|--------------------------|-----|-------|--------|----------|-------------------|------------|----------|-----------------|
|      |                          |     | AA    | Met    | n        | Mean $\pm$ s.e.m. | % increase | $\chi^2$ | $\rho > \chi^2$ |
| 8    | <i>Da-GAL4&gt;dInRDN</i> | F   | 1.0X  | 0.2 mM | 104      | 48.87 $\pm$ 1.00  | -7.25      | 3.29     | 0.07            |
|      | <i>+&gt;dInRDN</i>       | F   |       |        | 94       | 52.69 $\pm$ 0.90  | Control    |          |                 |
|      | <i>Da-GAL4&gt;dInRDN</i> | F   |       | 1 mM   | 106      | 58.56 $\pm$ 1.29  | -3.11      |          |                 |
|      | <i>+&gt;dInRDN</i>       | F   |       |        | 81       | 60.44 $\pm$ 1.16  | Control    |          |                 |
|      | <i>Da-GAL4&gt;dInRDN</i> | F   | 0.4X  | 0.2 mM | 106      | 64.50 $\pm$ 0.93  | -3.49      | 3.37     | 0.07            |
|      | <i>+&gt;dInRDN</i>       | F   |       |        | 101      | 66.83 $\pm$ 1.01  | Control    |          |                 |
|      | <i>Da-GAL4&gt;dInRDN</i> | F   |       | 1 mM   | 103      | 66.41 $\pm$ 1.03  | 15.14      |          |                 |
|      | <i>+&gt;dInRDN</i>       | F   |       |        | 88       | 57.68 $\pm$ 1.22  | Control    |          |                 |
|      | <i>Da-GAL4&gt;dTSC2</i>  | F   | 1.0X  | 0.2 mM | 149      | 49.77 $\pm$ 0.87  | -7.65      | 5.54     | 0.02            |
|      | <i>+&gt;dTSC2</i>        | F   |       |        | 106      | 53.89 $\pm$ 0.93  | Control    |          |                 |
|      | <i>Da-GAL4&gt;dTSC2</i>  | F   |       | 1 mM   | 147      | 61.02 $\pm$ 1.20  | -6.98      |          |                 |
|      | <i>+&gt;dTSC2</i>        | F   |       |        | 104      | 65.60 $\pm$ 1.21  | Control    |          |                 |
|      | <i>Da-GAL4&gt;dTSC2</i>  | F   | 0.4X  | 0.2 mM | 142      | 66.44 $\pm$ 0.68  | -10.90     | 50.28    | <.0001          |
|      | <i>+&gt;dTSC2</i>        | F   |       |        | 111      | 74.57 $\pm$ 1.17  | Control    |          |                 |
|      | <i>Da-GAL4&gt;dTSC2</i>  | F   |       | 1 mM   | 152      | 85.05 $\pm$ 0.72  | 18.65      |          |                 |
|      | <i>+&gt;dTSC2</i>        | F   |       |        | 111      | 71.68 $\pm$ 1.07  | Control    |          |                 |

GB: Genetic Background, F: Female, AA: Amino acids, +:  $w^{1118}$

\*: % increase of mean lifespan over control flies
